# Supplementary material
Source: PubMed Central journal article supplement (PMC10896455)

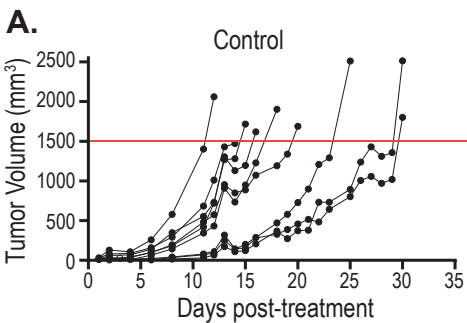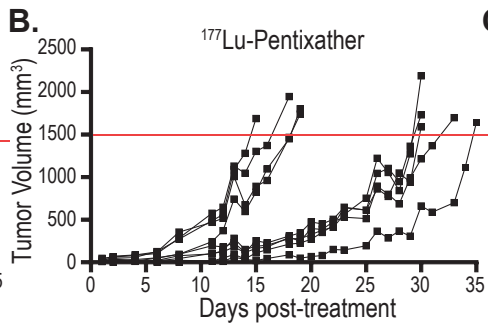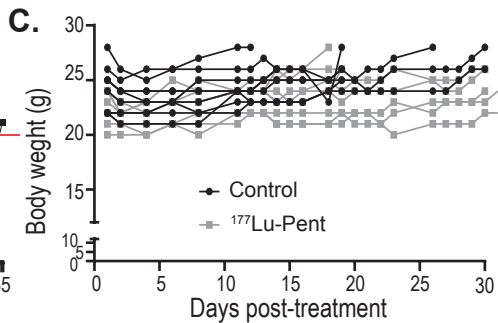

Supplement: NIHMS1960532-supplement-Supplementary_file_1.pdf [file NIHMS1960532-supplement-Supplementary_file_1.pdf]
